# Supplementary material for: A multi-site passive approach to studying the emissions and evolution of smoke from prescribed fires
Source: Copernicus journal article supplement (doi:10.5194/acp-24-12749-2024), 2024-11-17
Supplement: Supplementary file 1 [file acp-24-12749-2024-supplement.zip]

## Sheet: Sheet1
Date	Monitoring Site	Latitude of monitoring site	Longitude of monitoring site	Local start time of smoke detection	Local end time of smoke detection	Fire/ Source	Method used for source determination	Total Area (Acres)	Burn Area (Acres)	Latitude of centroid of burn area	Longitude of centroid of burn area	Date of last burn	Stand condition	Current Year Wildfire Reduced Burn Area Acres	Ignition Time	Ignition type
2021-03-23	Main Trailer	32.5229	-84.8234	2021-03-23 12:20:00	2021-03-23 17:20:00	On Base Prescribed fire of unit N34- A	Wind Vector & HYSPLIT	442	273	32.4247	-84.7006	2019-04-16	77 acres of longleaf pine plantation	No	N/A	backing, flanking, strip head, point source
						On Base Prescribed fire of unit N34- B		771	376	32.4291	-84.7153	2019-04-16	0 acres of longleaf pine plantation	No	N/A	backing, flanking, strip head, point source
2021-03-30	Main Trailer	32.5229	-84.8234	2021-03-30 09:40:00	2021-03-30 12:20:00	Off base fire	HYSPLIT	N/A	N/A	32.1839	-84.119	N/A	N/A	N/A	N/A	N/A
2021-04-06	Main Trailer	32.5229	-84.8234	2021-04-05 19:00:00	2021-04-06 11:00:00	On Base Prescribed fire of unit N12	Wind Vector & HYSPLIT	854	498	32.4685	-84.8123	2017-03-28	62 acres of longleaf pine plantation	No	N/A	backing, flanking, strip head, point source
						On Base Prescribed fire of unit N13		568	264	32.4628	-84.7976	2019-04-24	70 acres of longleaf pine plantation	No	N/A	backing, flanking, strip head, point source
2021-04-07	Main Trailer	32.5229	-84.8234	2021-04-06 17:20:00	2021-04-07 11:20:00	On Base Prescribed fire of unit N08	Wind Vector & HYSPLIT	515	367	32.5006	-84.8269	2018-01-04	10 acres of longleaf pine plantation	No	N/A	backing, flanking, strip head, point source
2021-04-08	Main Trailer	32.5229	-84.8234	2021-04-07 19:00:00	2021-04-08 04:40:00	On Base Prescribed fire of unit S50-A	Wind Vector & HYSPLIT	351	147	32.358	-84.8183	2018-03-16	78 acres of longleaf pine plantation	No	2021-04-07 10:00:00	backing, flanking, strip head, point source
						On Base Prescribed fire of unit S50-B		309	240	32.3486	-84.8235	2019-03-14	147 acres of longleaf pine plantation	No	2021-04-07 10:00:00	backing, flanking, strip head, point source
						On Base Prescribed fire of unit S51-A		606	281	32.3509	-84.808	2017-03-07	102 acres of longleaf pine plantation	No	2021-04-07 10:00:00	backing, flanking, strip head, point source
						On Base Prescribed fire of unit S51-B		470	356	32.3394	-84.8116	2018-03-16	127 acres of longleaf pine plantation	No	2021-04-07 10:00:00	backing, flanking, strip head, point source
						On Base Prescribed fire of unit S52-A		527	201	32.3292	-84.8019	2018-03-16	24 acres of longleaf pine plantation	No	2021-04-07 10:00:00	backing, flanking, strip head, point source
2021-04-13	Main Trailer	32.5229	-84.8234	2021-04-13 05:00:00	2021-04-13 10:20:00	On Base Prescribed fire of unit N20-K	Wind Vector & HYSPLIT	518	264	32.5001	-84.7923	2017-05-11	27 acres of longleaf pine plantation	No	N/A	backing, flanking, strip head, point source
						On Base Prescribed fire of unit N20-J		266	199	32.5051	-84.8003	2018-01-03	7 acres of longleaf pine plantation	No	N/A	backing, flanking, strip head, point source
2021-04-14	Main Trailer	32.5229	-84.8234	2021-04-14 12:40:00	2021-04-14 15:20:00	On Base Prescribed fire of unit C05	Wind Vector & HYSPLIT	359	171	32.462	-84.8651	2018-03-08	41 acres of longleaf pine plantation	No	N/A	backing, flanking, strip head, point source
						On Base Prescribed fire of unit S44-A		347	73	32.4034	-84.878	2018-03-09	71 acres of longleaf pine plantation	No	N/A	backing, flanking, strip head, point source
						On Base Prescribed fire of unit S44-B		163	59	32.4014	-84.8849	2018-04-18	59 acres of longleaf pine plantation	No	N/A	backing, flanking, strip head, point source
						On Base Prescribed fire of unit SHC-G		209	147	32.4212	-84.8744	2018-04-18	88 acres of longleaf pine plantation	No	N/A	backing, flanking, strip head, point source
2021-04-20	Main Trailer	32.5229	-84.8234	2021-04-19 20:20:00	2021-04-20 09:20:00	On Base Prescribed fire of unit N09-A	Wind Vector & HYSPLIT	527	362	32.5082	-84.8211	2018-03-21	11 acres of longleaf pine plantation	No	N/A	backing, flanking, strip head, point source
						On Base Prescribed fire of unit N09-B		431	264	32.4992	-84.81	2019-02-08	125 acres of longleaf pine plantation	No	N/A	backing, flanking, strip head, point source
2021-04-21	Main Trailer	32.5229	-84.8234	2021-04-20 19:20:00	2021-04-21 07:20:00	On Base Prescribed fire of unit S46-A	Wind Vector	410	190	32.3866	-84.8556	2018-03-24	135 acres of longleaf pine plantation	No	4/20/2021 9:30:00 AM*	backing, flanking, strip head, point source
2021-04-21	Main Trailer	32.5229	-84.8234	2021-04-21 11:00:00	2021-04-21 18:00:00	On Base Prescribed fire of unit N04-A	Wind Vector & HYSPLIT	313	211	32.5305	-84.8298	2018-03-14	52 acres of longleaf pine plantation	No	N/A	backing, flanking, strip head, point source
						On Base Prescribed fire of unit N04-B		210	154	32.5226	-84.8296	2018-03-14	10 acres of longleaf pine plantation	No	N/A	backing, flanking, strip head, point source
2021-04-30	Main Trailer	32.4189	-84.7739	2021-04-30 22:00:00	2021-05-01 02:40:00	N/A
2022-02-11	Main Trailer	32.4189	-84.7739	2022-02-11 12:20:00	2021-02-11 15:40:00	On Base Prescribed fire of unit C21-A	Wind Vector & HYSPLIT	338	94	32.4076	-84.8029	2019-04-04	29 acres of longleaf pine plantation	N/A	N/A	N/A
						On Base Prescribed fire of unit C23		304	189	32.4116	-84.7871	2019-03-22	84 acres of longleaf pine plantation	N/A	N/A	N/A
2022-02-12	Main Trailer	32.4189	-84.7739	2022-02-12 12:40:00	2022-02-12 15:20:00	On Base Prescribed fire of unit C06-A	Wind Vector & HYSPLIT	603	169	32.4553	-84.8506	2016-05-08	64 acres of longleaf pine plantation	N/A	N/A	N/A
						On Base Prescribed fire of unit C06-D		366	203	32.4416	-84.8589	2018-03-15	74 acres of longleaf pine plantation	N/A	N/A	N/A
						On Base Prescribed fire of unit C06-E		388	206	32.4464	-84.8547	2018-01-05	21 acres of longleaf pine plantation	N/A	N/A	N/A
2022-02-13	Main Trailer	32.4189	-84.7739	2021-02-13 10:40:00	2022-02-13 16:00:00	On Base Prescribed fire of unit C06-B	Wind Vector & HYSPLIT	398	155	32.4579	-84.834	2016-10-05	16 acres of longleaf pine plantation	N/A	N/A	N/A
						On Base Prescribed fire of unit C06-F		543	352	32.4451	-84.8402	2016-10-23	0 acres of longleaf pine plantation	N/A	N/A	N/A
						On Base Prescribed fire of unit C06-G		802	522	32.4445	-84.8272	2016-10-23	0 acres of longleaf pine plantation	N/A	N/A	N/A
						On Base Prescribed fire of unit N01		330	205	32.4745	-84.8634	2018-03-08	133 acres of longleaf pine plantation	N/A	N/A	N/A
						On Base Prescribed fire of unit N02		525	276	32.4712	-84.8523	2018-03-22	91 acres of longleaf pine plantation	N/A	N/A	N/A
2022-02-13	Main Trailer	32.4189	-84.7739	2021-02-13 18:00:00	2021-02-14 04:40:00	On Base Prescribed fire of unit C06-B	Wind Vector & HYSPLIT	398	155	32.4579	-84.834	2016-10-05	16 acres of longleaf pine plantation	N/A	N/A	N/A
						On Base Prescribed fire of unit C06-F		543	352	32.4451	-84.8402	2016-10-23	0 acres of longleaf pine plantation	N/A	N/A	N/A
						On Base Prescribed fire of unit C06-G		802	522	32.4445	-84.8272	2016-10-23	0 acres of longleaf pine plantation	N/A	N/A	N/A
						On Base Prescribed fire of unit N01		330	205	32.4745	-84.8634	2018-03-08	133 acres of longleaf pine plantation	N/A	N/A	N/A
						On Base Prescribed fire of unit N02		525	276	32.4712	-84.8523	2018-03-22	91 acres of longleaf pine plantation	N/A	N/A	N/A
2022-02-26	Main Trailer	32.4189	-84.7739	2022-02-26 11:40:00	2022-02-26 17:00:00	On Base Prescribed fire of unit N06	Wind Vector	736	524	32.4809	-84.8382	2017-03-21	54 acres of longleaf pine plantation	N/A	N/A	N/A
2022-02-27	Main Trailer	32.4189	-84.7739	2022-02-27 09:20:00	2022-02-27 11:40:00	On Base Prescribed fire of unit N06	Wind Vector	736	524	32.4809	-84.8382	2017-03-22	54 acres of longleaf pine plantation	N/A	N/A	N/A
2022-03-01	Main Trailer	32.4189	-84.7739	2022-03-01 13:00:00	2022-03-01 17:40:00	On Base Prescribed fire of unit C01-A	Wind Vector	181	66	32.4437	-84.8957	2019-03-21	41 acres of longleaf pine plantation	N/A	N/A	N/A
						On Base Prescribed fire of unit C01-B		229	135	32.4358	-84.8891	2018-03-22	0 acres of longleaf pine plantation	N/A	N/A	N/A
						On Base Prescribed fire of unit C01-C		208	142	32.4348	-84.8816	2017-02-25	2 acres of longleaf pine plantation	N/A	N/A	N/A
						On Base Prescribed fire of unit C02-A		194	128	32.4519	-84.8926	2018-03-22	128 acres of longleaf pine plantation	N/A	N/A	N/A
						On Base Prescribed fire of unit C02-B		179	96	32.4494	-84.8866	2018-03-22	78 acres of longleaf pine plantation	N/A	N/A	N/A
						On Base Prescribed fire of unit C02-C		463	285	32.4462	-84.8791	2019-03-21	0 acres of longleaf pine plantation	N/A	N/A	N/A
2022-03-02	Main Trailer	32.4189	-84.7739	2022-03-02 17:20:00	2022-03-03 12:20:00	On Base Prescribed fire of unit S46-B	Wind Vector & HYSPLIT	259	73	32.3813	-84.8485	2018-03-24	36 acres of longleaf pine plantation	N/A	N/A	N/A
						On Base Prescribed fire of unit S47		526	202	32.3813	-84.8384	2018-03-28	149 acres of longleaf pine plantation	N/A	N/A	N/A
2022-03-04	Main Trailer	32.4189	-84.7739	2022-03-04 08:40:00	2022-03-04 10:40:00	Off base fire	HYSPLIT	N/A	N/A	32.4293	-84.6456	N/A	N/A	N/A	N/A	N/A
2022-03-04	Main Trailer	32.4189	-84.7739	2022-03-04 17:20:00	2022-03-05 07:40:00	Off base fire	HYSPLIT	N/A	N/A	32.4293	-84.6456	N/A	N/A	N/A	N/A	N/A
2022-03-05	Main Trailer	32.4189	-84.7739	2022-03-05 17:40:00	2022-03-05 22:20:00	N/A
2022-03-07	Main Trailer	32.4189	-84.7739	2022-03-07 03:20:00	2022-03-07 09:40:00	On Base wildfire of unit C51	Wind Vector	25	25	32.3256	-84.7114	2020-01-09	19 acres of longleaf pine plantation	N/A	N/A	N/A
2022-03-07	Main Trailer	32.4189	-84.7739	2022-03-07 22:40:00	2022-03-08 03:20:00	On Base Prescribed fire of unit C08-A	HYSPLIT	517	216	32.4102	-84.8363	2019-04-15	209 acres of longleaf pine plantation	N/A	N/A	N/A
						On Base Prescribed fire of unit C08-B		384	194	32.4042	-84.8412	2019-04-15	122 acres of longleaf pine plantation	N/A	N/A	N/A
						On Base Prescribed fire of unit C08-C		271	142	32.3979	-84.8356	2019-04-15	103 acres of longleaf pine plantation	N/A	N/A	N/A
2022-03-14	Main Trailer	32.4189	-84.7739	2022-03-14 21:00:00	2022-03-15 02:00:00	On Base Prescribed fire of unit C41-B	HYSPLIT	333	225	32.405	-84.7293	2019-03-08	26 acres of longleaf pine plantation	N/A	N/A	N/A
2022-03-25	Main Trailer	32.4189	-84.7739	2022-03-25 12:00:00	2022-03-25 13:00:00	On Base Prescribed fire of unit C10	Wind Vector & HYSPLIT	196	92	32.4291	-84.8048	2019-04-01	60 acres of longleaf pine plantation	N/A	N/A	N/A
2022-03-29	Main Trailer	32.4189	-84.7739	2022-03-29 11:00:00	2022-03-30 03:20:00	On Base Prescribed fire of unit C24	Wind Vector & HYSPLIT	480	313	32.4046	-84.7766	2020-01-08	145 acres of longleaf pine plantation	N/A	N/A	N/A
2022-04-04	Main Trailer	32.4189	-84.7739	2022-04-04 22:00:00	2022-04-05 08:20:00	On Base Prescribed fire of unit C44	Wind Vector & HYSPLIT	1033	590	32.3918	-84.7203	2020-03-14	229 acres of longleaf pine plantation	N/A	N/A	N/A
						On Base Prescribed fire of unit C45		580	272	32.38	-84.7141	2020-03-14	128 acres of longleaf pine plantation	N/A	N/A	N/A
2022-04-25	Main Trailer	32.4189	-84.7739	2022-04-25 14:40:00	2022-04-25 17:40:00	On Base Prescribed fire of unit S42-A	Wind Vector & HYSPLIT	974	161	32.2668	-84.8557	2019-03-09	47 acres of longleaf pine plantation	N/A	N/A	N/A
						On Base Prescribed fire of unit S42-B		1090	154	32.2512	-84.8641	2019-03-09	91 acres of longleaf pine plantation	N/A	N/A	N/A
2022-05-09	Main Trailer	32.4189	-84.7739	2022-05-09 15:40:00	2022-05-09 18:40:00	Off base fire	Wind Vector & HYSPLIT	N/A	N/A	32.5767	-84.4574	N/A	N/A	N/A	N/A	N/A
2022-03-21	T1293	32.3641	-84.8777	2022-03-21 12:20:00	2022-03-21 22:00:00	On Base Prescribed fire of unit S38-A	Wind Vector & HYSPLIT	455	202	32.2918	-84.7972	2019-03-18	45 acres of longleaf pine plantation	N/A	N/A	N/A
						On Base Prescribed fire of unit S38-B		459	153	32.2779	-84.8033	2019-03-18	93 acres of longleaf pine plantation	N/A	N/A	N/A
						On Base Prescribed fire of unit S38-C		631	182	32.2672	-84.7985	2019-03-18	64 acres of longleaf pine plantation	N/A	N/A	N/A
2022-03-25	T1293	32.3641	-84.8777	2022-03-25 04:40:00	2022-03-25 06:40:00	On Base Prescribed fire of unit S08-A	Wind Vector & HYSPLIT	922	363	32.2656	-84.9326	2020-02-28	167 acres of longleaf pine plantation	N/A	N/A	N/A
						On Base Prescribed fire of unit S08-B		433	221	32.2794	-84.9276	2020-02-28	88 acres of longleaf pine plantation	N/A	N/A	N/A
						On Base Prescribed fire of unit S08-C		463	366	32.2689	-84.9181	2020-02-28	143 acres of longleaf pine plantation	N/A	N/A	N/A
						On Base Prescribed fire of unit S08-D		1345	100	32.2618	-84.9094	2020-02-28	20 acres of longleaf pine plantation	N/A	N/A	N/A
						On Base Prescribed fire of unit S09		258	77	32.3221	-84.9892	2015-01-30	56 acres of longleaf pine plantation	N/A	N/A	N/A
						On Base Prescribed fire of unit S10		224	11	32.3102	-84.9592	2015-01-30	0 acres of longleaf pine plantation	N/A	N/A	N/A
2022-03-26	T1293	32.3641	-84.8777	2022-03-26 13:00:00	2022-03-26 19:00:00	On Base Prescribed fire of unit S19-A	Wind Vector & HYSPLIT	72	46	32.3647	-84.8768	2019-03-18	0 acres of longleaf pine plantation	N/A	N/A	N/A
2022-03-27	T1293	32.3641	-84.8777	2022-03-27	2022-03-27 09:40:00	On Base Prescribed fire of unit S19-A	Wind Vector & HYSPLIT	72	46	32.3647	-84.8768	2019-03-18	0 acres of longleaf pine plantation	N/A	N/A	N/A
2022-03-28	T1293	32.3641	-84.8777	2022-03-28 02:20:00	2022-03-28 09:20:00	On Base Prescribed fire of unit N20-A	Wind Vector & HYSPLIT	409	176	32.53	-84.814	2019-03-17	55 acres of longleaf pine plantation	N/A	2022-03-27 10:00:00	N/A
						On Base Prescribed fire of unit N20-B		358	124	32.5386	-84.8017	2019-03-17	50 acres of longleaf pine plantation	N/A	2022-03-27 10:00:00	N/A
						On Base Prescribed fire of unit N20-C		710	248	32.5366	-84.7813	2019-03-17	109 acres of longleaf pine plantation	N/A	2022-03-27 10:00:00	N/A
						On Base Prescribed fire of unit N20-E		594	347	32.5201	-84.8137	2019-03-17	70 acres of longleaf pine plantation	N/A	2022-03-27 10:00:00	N/A
						On Base Prescribed fire of unit N20-G		971	541	32.5252	-84.7949	2018-01-04	430 acres of longleaf pine plantation	N/A	2022-03-27 10:00:00	N/A
						On Base Prescribed fire of unit N20-H		604	253	32.5212	-84.7819	2018-01-03	216 acres of longleaf pine plantation	N/A	2022-03-27 10:00:00	N/A
2022-03-29	T1293	32.3641	-84.8777	2022-03-28 20:20:00	2022-03-29 06:00:00	On Base Prescribed fire of unit N16	Wind Vector	943	473	32.4704	-84.7789	2020-02-28	94 acres of longleaf pine plantation	N/A	N/A	N/A
2022-04-05	T1293	32.3641	-84.8777	2022-04-04 23:40:00	2022-04-05 11:40:00	Off base fire	HYSPLIT	N/A	N/A	32.0387	-84.4699	N/A	N/A	N/A	N/A	N/A
2022-04-21	T1293	32.3641	-84.8777	2022-04-21 12:40:00	2022-04-21 15:00:00	On Base Prescribed fire of unit S40-A	Wind Vector	396	125	32.285	-84.8318	2019-03-09	57 acres of longleaf pine plantation	N/A	N/A	N/A
						On Base Prescribed fire of unit S40-B		683	159	32.2743	-84.8315	2019-03-09	137 acres of longleaf pine plantation	N/A	N/A	N/A
2022-04-23	T1293	32.3641	-84.8777	2022-04-23 12:00:00	2022-04-23 18:40:00	On Base Prescribed fire of unit S36-A	Wind Vector & HYSPLIT	325	212	32.3359	-84.8436	2019-03-19	60 acres of longleaf pine plantation	N/A	4/23/2022 8:45:00 AM**	N/A
						On Base Prescribed fire of unit S36-C		437	319	32.3337	-84.8252	2019-03-19	89 acres of longleaf pine plantation	N/A	4/23/2022 8:45:00 AM**	N/A
						On Base Prescribed fire of unit S36-D		678	187	32.3217	-84.8234	2019-03-19	15 acres of longleaf pine plantation	N/A	4/23/2022 8:45:00 AM**	N/A
2022-04-23	T1293	32.3641	-84.8777	2022-04-23 19:20:00	2022-04-23 22:20:00	On Base Prescribed fire of unit S36-A	Wind Vector & HYSPLIT	325	212	32.3359	-84.8436	2019-03-19	60 acres of longleaf pine plantation	N/A	4/23/2022 8:45:00 AM**	N/A
						On Base Prescribed fire of unit S36-C		437	319	32.3337	-84.8252	2019-03-19	89 acres of longleaf pine plantation	N/A	4/23/2022 8:45:00 AM**	N/A
						On Base Prescribed fire of unit S36-D		678	187	32.3217	-84.8234	2019-03-19	15 acres of longleaf pine plantation	N/A	4/23/2022 8:45:00 AM**	N/A
2022-04-24	T1293	32.3641	-84.8777	2022-04-24 12:00:00	2022-04-24 21:20:00	On Base Prescribed fire of unit S37-A	Wind Vector & HYSPLIT	617	206	32.3085	-84.8317	2019-03-18	60 acres of longleaf pine plantation	N/A	2022-04-24 10:00:00	N/A
						On Base Prescribed fire of unit S37-B		1040	364	32.3111	-84.8105	2019-03-18	76 acres of longleaf pine plantation	N/A	2022-04-24 10:00:00	N/A
						On Base Prescribed fire of unit S37-C		682	88	32.2978	-84.8289	2019-03-18	23 acres of longleaf pine plantation	N/A	2022-04-24 10:00:00	N/A
2022-04-26	T1293	32.3641	-84.8777	2022-04-25 21:00:00	2022-04-26 02:40:00	On Base Prescribed fire of unit S42-A	Wind Vector	974	161	32.2668	-84.8557	2019-03-09	47 acres of longleaf pine plantation	N/A	2022-04-25 10:30:00	N/A
						On Base Prescribed fire of unit S42-B		1090	154	32.2512	-84.8641	2019-03-09	91 acres of longleaf pine plantation	N/A	2022-04-25 10:30:00	N/A
2022-05-09	T1293	32.3641	-84.8777	2022-05-09 16:00:00	2022-05-09 20:00:00	Off base fire	Wind Vector & HYSPLIT	N/A	N/A	32.5767	-84.4574	N/A	N/A	N/A	N/A	N/A
2022-05-10	T1293	32.3641	-84.8777	2022-05-10 20:20:00	2022-05-11 00:20:00	Off base fire	Wind Vector & HYSPLIT	N/A	N/A	32.589	-84.7652	N/A	N/A	N/A	N/A	N/A
2022-05-11	T1293	32.3641	-84.8777	2022-05-11 12:40:00	2022-05-11 20:40:00	On Base Prescribed fire of unit S34-A	Wind Vector & HYSPLIT	362	140	32.3848	-84.8804	2017-05-08	60 acres of longleaf pine plantation	N/A	N/A	N/A
2022-05-12	T1293	32.3641	-84.8777	2022-05-12 01:00:00	2022-05-12 08:00:00	On Base wildfire of Hastings range	Wind Vector & HYSPLIT	572	527	N/A	N/A	2021-03-14	449 acres of longleaf pine plantation	N/A	N/A	N/A
2022-03-21	T1292	32.4732	-84.7589	2022-03-21 22:00:00	2022-03-22 01:00:00	Off base fire	Wind Vector & HYSPLIT	N/A	N/A	32.3578	-84.4323	N/A	N/A	N/A	N/A	N/A
2022-03-22	T1292	32.4732	-84.7589	2022-03-22 12:20:00	2022-03-23 07:20:00	Off base fire	HYSPLIT	N/A	N/A	32.1426	-84.6695	N/A	N/A	N/A	N/A	N/A
2022-03-26	T1292	32.4732	-84.7589	2022-03-26 21:00:00	2022-03-27 00:40:00	On Base Prescribed fire of unit N05	Wind Vector & HYSPLIT	730	388	32.4683	-84.8325	2018-04-18	0 acres of longleaf pine plantation	N/A	N/A	N/A
2022-03-27	T1292	32.4732	-84.7589	2022-03-27 05:00:00	2022-03-27 12:20:00	On Base Prescribed fire of unit N20-D	Wind Vector & HYSPLIT	182	70	32.5411	-84.7732	2018-04-19	12 acres of longleaf pine plantation	N/A	N/A	N/A
						On Base Prescribed fire of unit N21-A		448	232	32.5422	-84.7635	2018-04-19	18 acres of longleaf pine plantation	N/A	N/A	N/A
2022-03-27	T1292	32.4732	-84.7589	2022-03-27 18:40:00	2022-03-28 01:00:00	On Base Prescribed fire of unit N20-D	Wind Vector & HYSPLIT	182	70	32.5411	-84.7732	2018-04-19	12 acres of longleaf pine plantation	N/A	N/A	N/A
						On Base Prescribed fire of unit N21-A		448	232	32.5422	-84.7635	2018-04-19	18 acres of longleaf pine plantation	N/A	N/A	N/A
2022-03-28	T1292	32.4732	-84.7589	2022-03-28 10:00:00	2022-03-29 10:00:00	On Base Prescribed fire of unit N16	Wind Vector & HYSPLIT	943	473	32.4704	-84.7789	2020-02-28	94 acres of longleaf pine plantation	N/A	N/A	N/A
						On Base Prescribed fire of unit N23-A		586	396	32.5029	-84.7661	2019-03-20	86 acres of longleaf pine plantation	N/A	N/A	N/A
						On Base Prescribed fire of unit N23-B		667	287	32.5038	-84.7523	2019-03-20	101 acres of longleaf pine plantation	N/A	N/A	N/A
2022-03-29	T1292	32.4732	-84.7589	2022-03-29 11:00:00	2022-03-29 17:00:00	On Base Prescribed fire of unit C24	Wind Vector	480	313	32.4046	-84.7766	2020-01-08	145 acres of longleaf pine plantation	N/A	N/A	N/A
2022-03-30	T1292	32.4732	-84.7589	2022-03-29 19:40:00	2022-03-30 10:40:00	On Base Prescribed fire of unit C24	Wind Vector & HYSPLIT	480	313	32.4046	-84.7766	2020-01-08	145 acres of longleaf pine plantation	N/A	N/A	N/A
2022-04-11	T1292	32.4732	-84.7589	2022-04-11 12:40:00	2022-04-11 17:20:00	On Base Prescribed fire of unit C06-K	Wind Vector	728	224	32.4276	-84.8333	2017-04-30	42 acres of longleaf pine plantation	N/A	N/A	N/A
						On Base Prescribed fire of unit C07		419	123	32.4168	-84.8524	2018-01-24	123 acres of longleaf pine plantation	N/A	N/A	N/A
2022-04-25	T1292	32.4732	-84.7589	2022-04-25 15:00:00	2022-04-25 18:20:00	On Base Prescribed fire of unit S42-A	Wind Vector & HYSPLIT	974	161	32.2668	-84.8557	2019-03-09	47 acres of longleaf pine plantation	N/A	N/A	N/A
						On Base Prescribed fire of unit S42-B		1090	154	32.2512	-84.8641	2019-03-09	91 acres of longleaf pine plantation	N/A	N/A	N/A
2022-04-29	T1292	32.4732	-84.7589	2022-04-28 22:00:00	2022-04-29 01:00:00	N/A
2022-05-09	T1292	32.4732	-84.7589	2022-05-09 13:20:00	2022-05-09 17:20:00	Off base fire	Wind Vector & HYSPLIT	N/A	N/A	32.5767	-84.4574	N/A	N/A	N/A	N/A	N/A
2022-05-10	T1292	32.4732	-84.7589	2022-05-10 12:40:00	2022-05-10 16:00:00	Off base fire	Wind Vector	N/A	N/A	32.5598	-84.5455	N/A	N/A	N/A	N/A	N/A
2022-03-21	T1291	32.4946	-84.6533	2022-03-21 10:20:00	2022-03-21 13:20:00	Off base fire	Wind Vector & HYSPLIT	N/A	N/A	32.4477	-84.2497	N/A	N/A	N/A	N/A	N/A
2022-03-27	T1291	32.4946	-84.6533	2022-03-27 12:00:00	2022-03-27 19:40:00	On Base Prescribed fire of unit N20-D	Wind Vector & HYSPLIT	182	70	32.5411	-84.7732	2018-04-19	12 acres of longleaf pine plantation	N/A	N/A	N/A
						On Base Prescribed fire of unit N21-A		448	232	32.5422	-84.7635	2018-04-19	18 acres of longleaf pine plantation	N/A	N/A	N/A
2022-03-28	T1291	32.4946	-84.6533	2022-03-28 11:40:00	2022-03-28 16:40:00	On Base Prescribed fire of unit N23-A	Wind Vector & HYSPLIT	586	396	32.5029	-84.7661	2019-03-20	86 acres of longleaf pine plantation	N/A	N/A	N/A
						On Base Prescribed fire of unit N23-B		667	287	32.5038	-84.7523	2019-03-20	101 acres of longleaf pine plantation	N/A	N/A	N/A
2022-03-29	T1291	32.4946	-84.6533	2022-03-29 11:40:00	2022-03-29 15:20:00	On Base Prescribed fire of unit N35-A	Wind Vector	577	435	32.4099	-84.693	2020-01-31	35 acres of longleaf pine plantation	N/A	N/A	N/A
2022-05-09	T1291	32.4946	-84.6533	2022-05-09 13:20:00	2022-05-09 17:00:00	Off base fire	Wind Vector & HYSPLIT	N/A	N/A	32.5767	-84.4574	N/A	N/A	N/A	N/A	N/A
Notes: * Fire was not detected on GOES-16 until 12:26 **Fire was not detected on GOES-16 until 13:21
