# Supplementary material for: A multi-site passive approach to studying the emissions and evolution of smoke from prescribed fires
Source: Copernicus journal article supplement (doi:10.5194/acp-24-12749-2024), 2024-11-17
Supplement: Supplementary file 1 [file acp-24-12749-2024-supplement.zip]

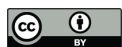

*Supplement of*

**A multi-site passive approach to studying the emissions and evolution of smoke from prescribed fires**

**Rime El Asmar et al.**

*Correspondence to:* Rodney J. Weber ([rweber@eas.gatech.edu](mailto:rweber@eas.gatech.edu))

- [acp-24-12749-2024-supplement-title-page.pdf](#)
- Supplementary Material
  - [Supplementary Material-Version 2.pdf](#)
  - [Table S1. Fire Information.xlsx](#)

The copyright of individual parts of the supplement might differ from the article licence.
